# Supplementary material for: A bispecific antibody targeting sclerostin and DKK-1 promotes bone mass accrual and fracture repair
Source: PubMed Central journal article supplement (PMC4894982; doi:10.1038/ncomms11505), 2016-05-27
Supplement: ncomms11505-s1.pdf [file ncomms11505-s1.pdf]

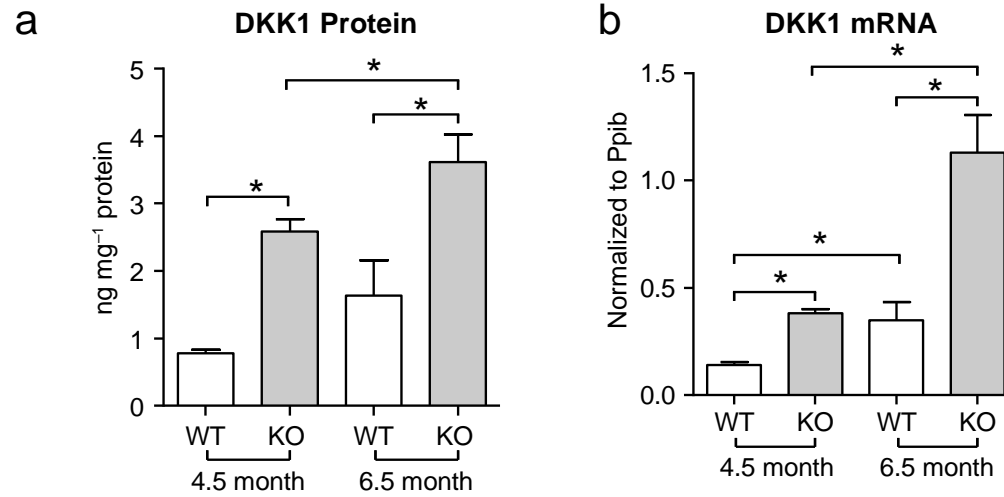

**Supplementary Figure 1** DKK1 was elevated in sclerostin-inhibited mice. (a) DKK1 protein and (b) DKK1 mRNA were assessed in the tibiae of wild-type (WT) and SOST knockout (KO) mice ( $n = 10/\text{group}$ ). Data are presented as Mean  $\pm$  SE;  $*P < 0.05$  as indicated by ANOVA + Tukey's *post-hoc* test.

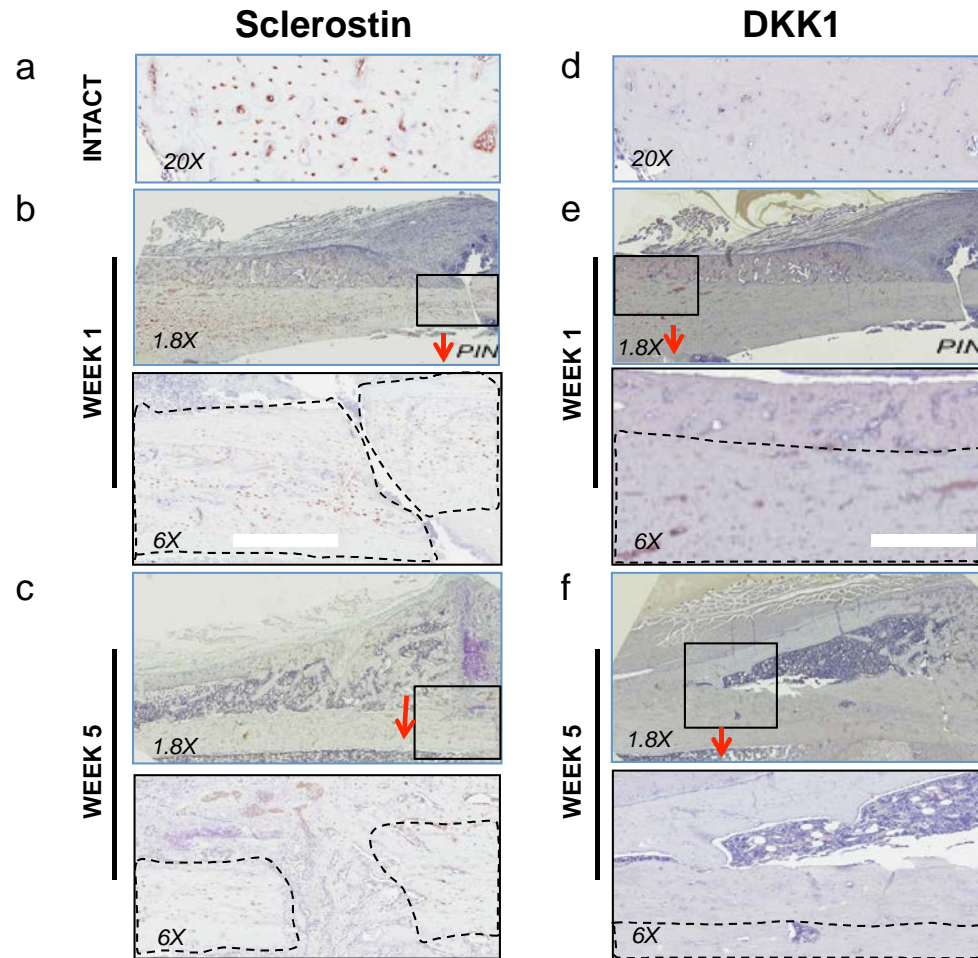

**Supplementary Figure 2** Expression of sclerostin and DKK1 in rats with femoral closed fractures and intact contralateral femurs was monitored by immunohistochemistry in the cortical and callus regions over time at week 1 and week 5 post-fracture. Expression of sclerostin and DKK1 in the intact cortex is shown in (a) and (d). Expression of sclerostin and DKK1 at low and high magnification is shown in regions proximal and distal to the fracture site (boxed regions) at week 1 post-fracture (b and e, upper and lower panels) and week 5 post-fracture (c and f, upper and lower panels). The position of the intramedullary pin is indicated and arrows point to magnified boxed regions of interest. White scale bars represent 500  $\mu$ m.

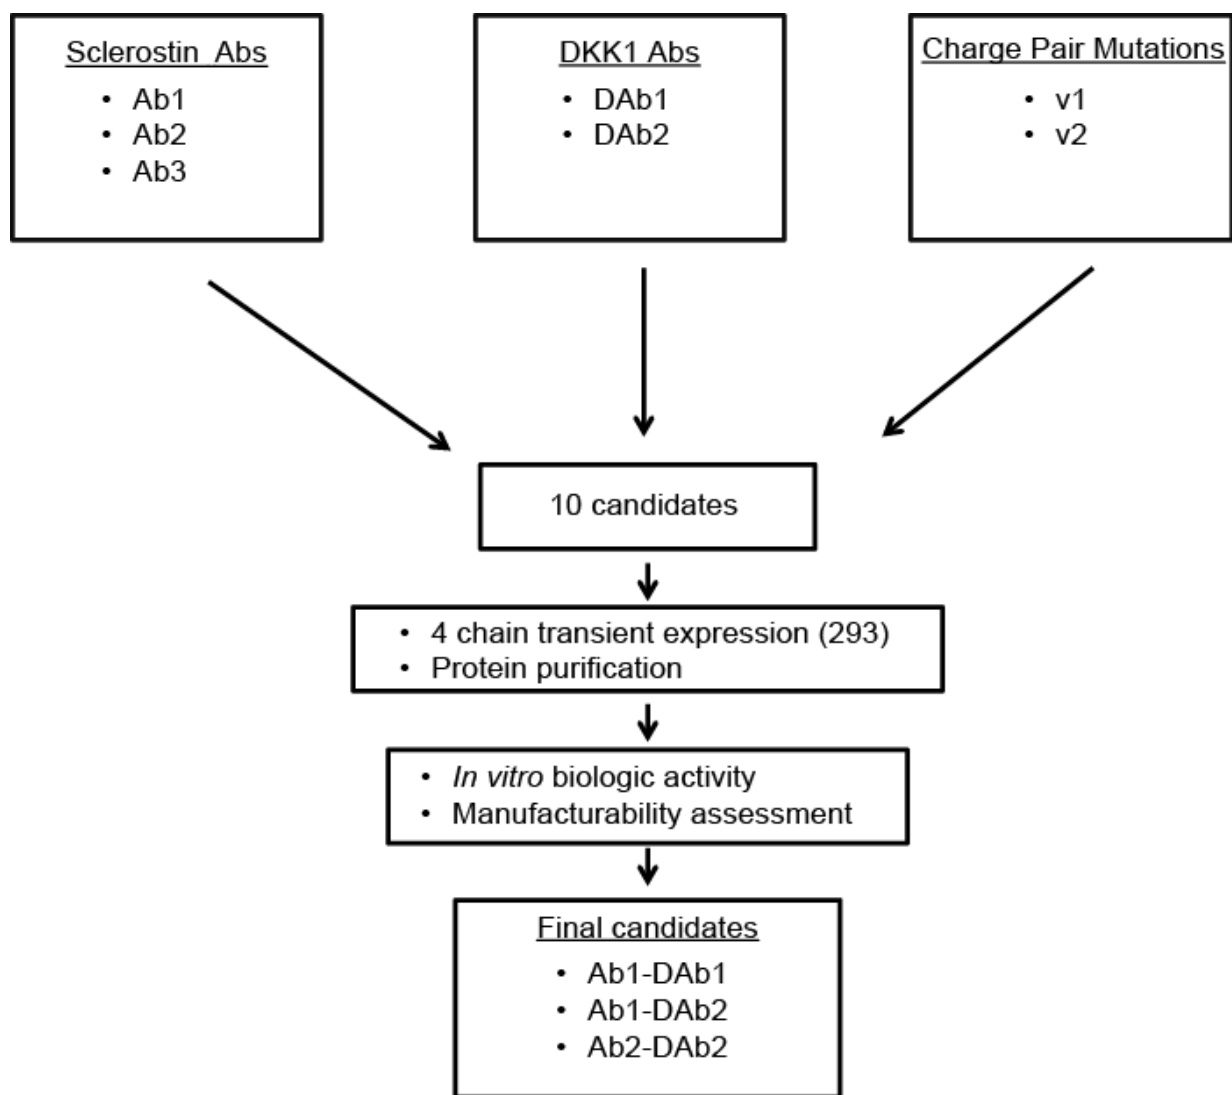

**Supplementary Figure 3** Flow chart showing criteria for selection of lead Hetero-DS molecules. The Hetero-DS version 1 (v1) is shown in Figure 3a. Version 2 (v2) has an additional charge pair mutation at the VL-VH interface.

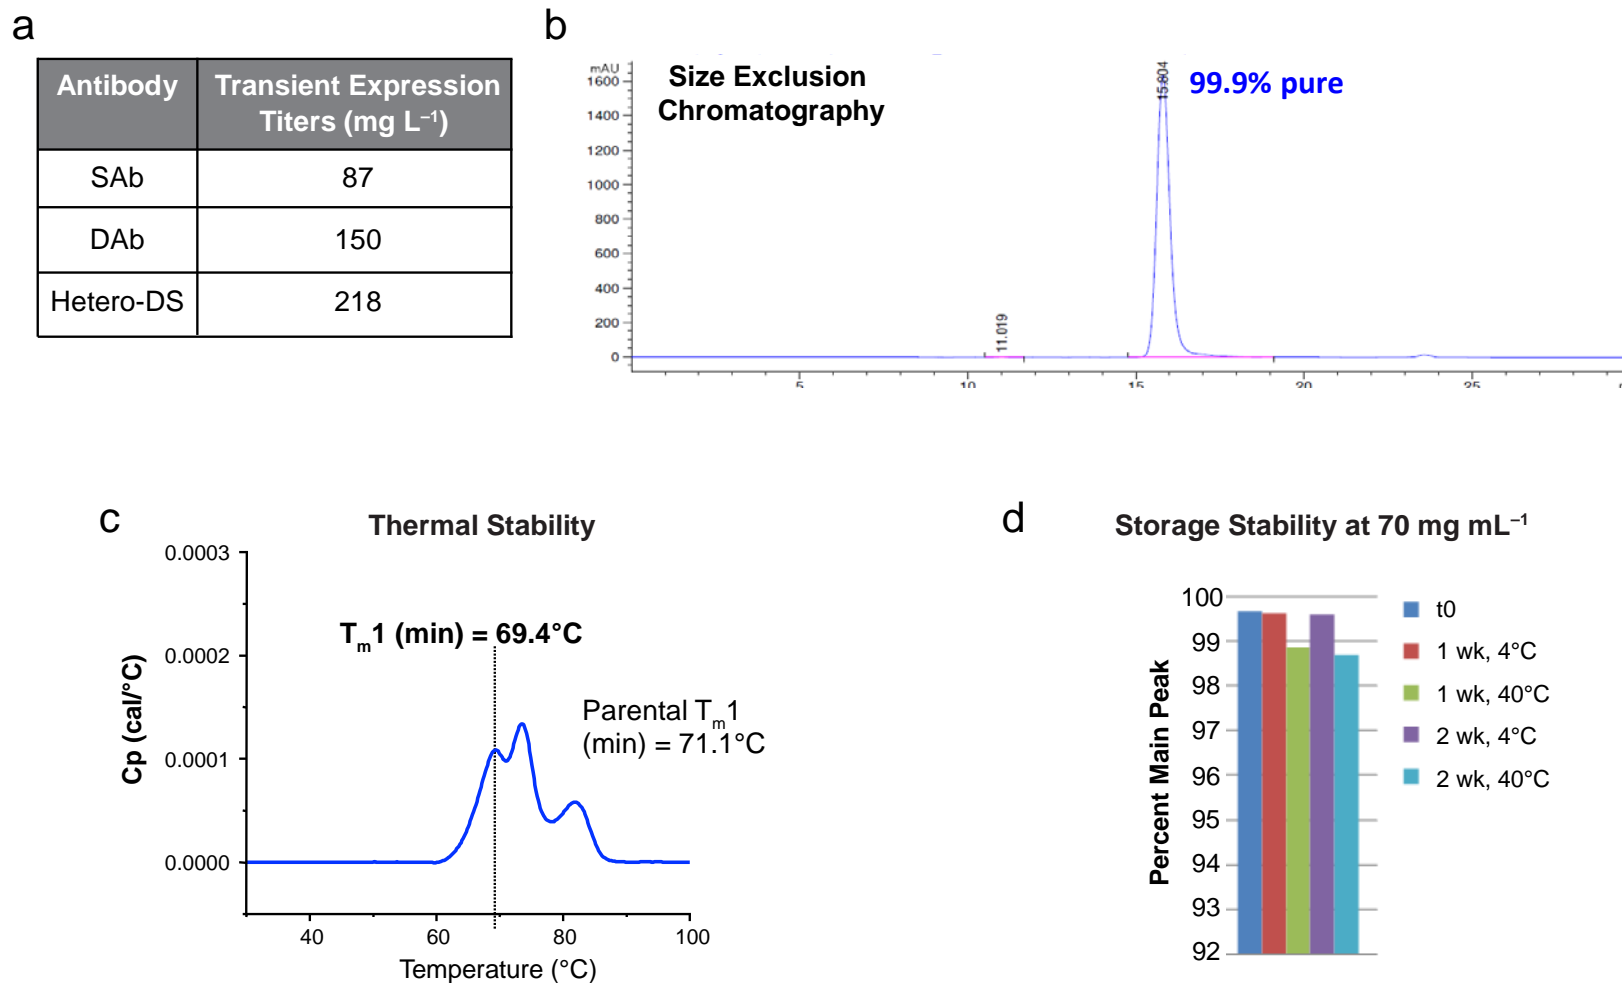

**Supplementary Figure 4** Expression levels and biophysical properties of a lead Hetero-DS candidate. **(a)** Comparison of parental monospecific and engineered hetero-DS bispecific antibody transient expression levels. **(b)** Purity as measured by SEC during production. **(c)** Differential Scanning Calorimetry (DSC) profile. The lowest thermal transition ( $T_{m1}$ ) for the Hetero-DS is 69.4°C compared to 71.1°C for the parental molecules. **(d)** Percent main peak as measured by Size Exclusion Chromatography (SEC) upon storage at high concentration (70 mg mL<sup>-1</sup>) for up to 2 weeks at a temperature of 4°C and 40°C.

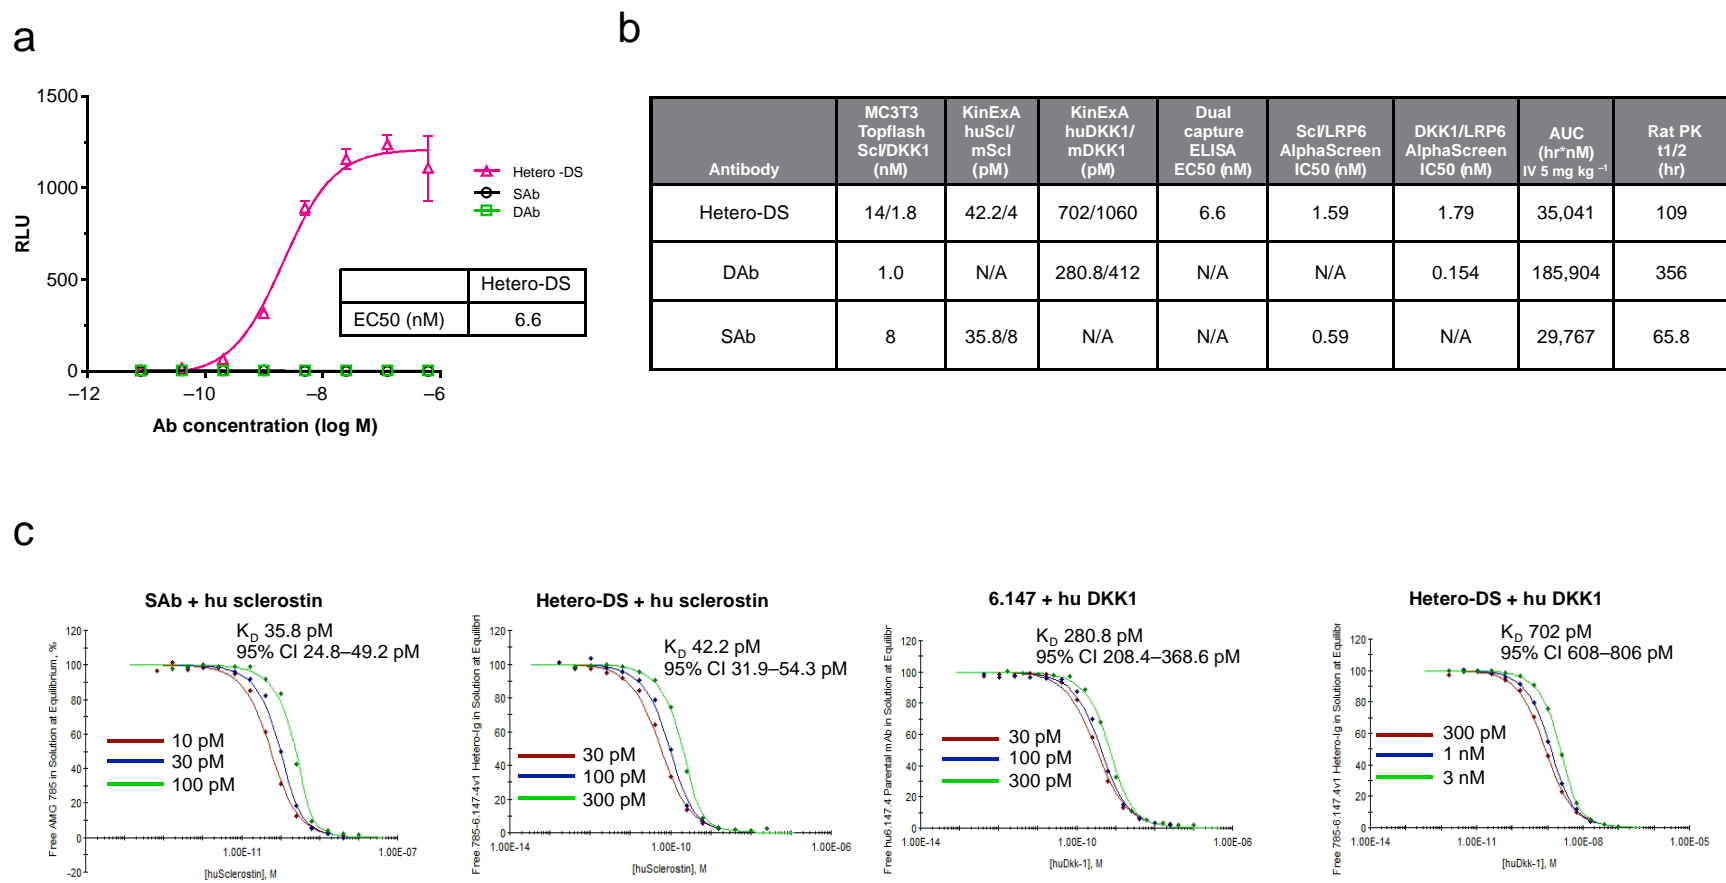

**Supplementary Figure 5** Hetero-DS attributes. **(a)** MC3T3E1 Topflash Wnt reporter assay comparing the *in vitro* biologic activity of Hetero-DS, SAb and DAb in the presence of both Dkk1 and Sclerostin ( $n = 3$ ). Data are presented as Mean  $\pm$  SEM. **(b)** Table comparing Hetero-DS, SAb and DAb in an i) *in vitro* MC3T3 Topflash reporter assay in the presence of DKK-1 or sclerostin, ii) KinExA-determined binding activity to DKK-1 or sclerostin, iii) dual antigen binding enzyme-linked immunosorbent assay (ELISA) showing binding to both sclerostin and DKK-1 ( $n = 3$ ), iv) LRP6/DKK1 and LRP6/sclerostin AlphaScreen assays ( $n=3$ ), and v) pharmacokinetic (Rat PK) properties ( $n=3$ /group). Data are presented as Mean  $\pm$  SEM. **(c)** KinExA-determined binding of Hetero-DS and parental antibodies to DKK-1 or sclerostin ( $n=3$ ).

**a**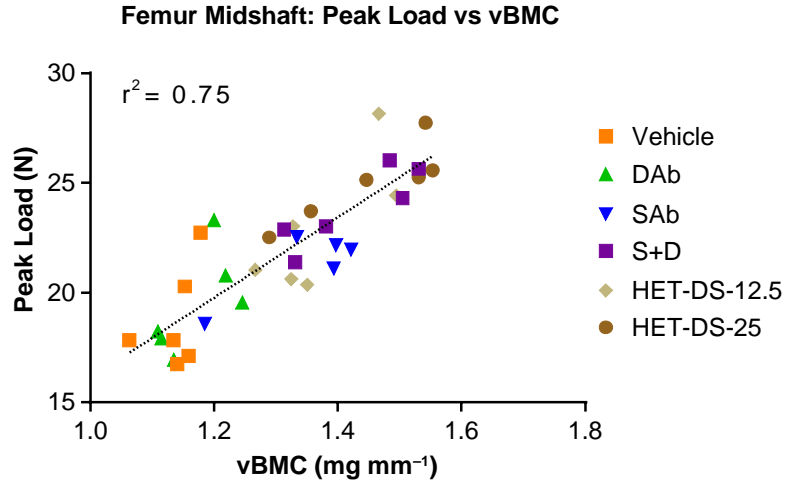**b**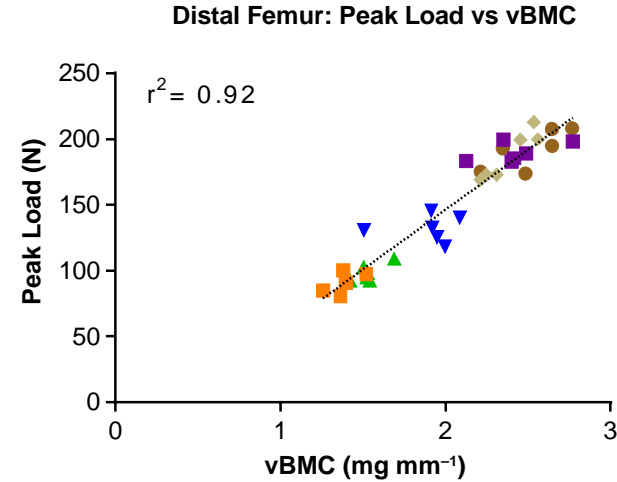

**Supplementary Figure 6** Bone mass - bone strength regressions in mice. Ten-week-old male B6D2F1 mice were injected subcutaneously twice weekly with Vehicle, sclerostin antibody (Scl-Ab; 12.5 mg kg<sup>-1</sup>), DKK1 antibody (DKK1-Ab; 12.5 mg kg<sup>-1</sup>), Hetero-DS (12.5 and 25 mg kg<sup>-1</sup>), or Scl-Ab + DKK1-Ab (S+D; 12.5 mg kg<sup>-1</sup> each) for 3 weeks ( $n = 6$ /group). At the femur midshaft, volumetric bone mineral content (vBMC) was determined by micro-computed tomography (microCT) and peak load was determined by strength testing. Regressions and coefficients of variation between these parameters are shown at (a) the femur midshaft and (b) the distal femur across all treatment groups.

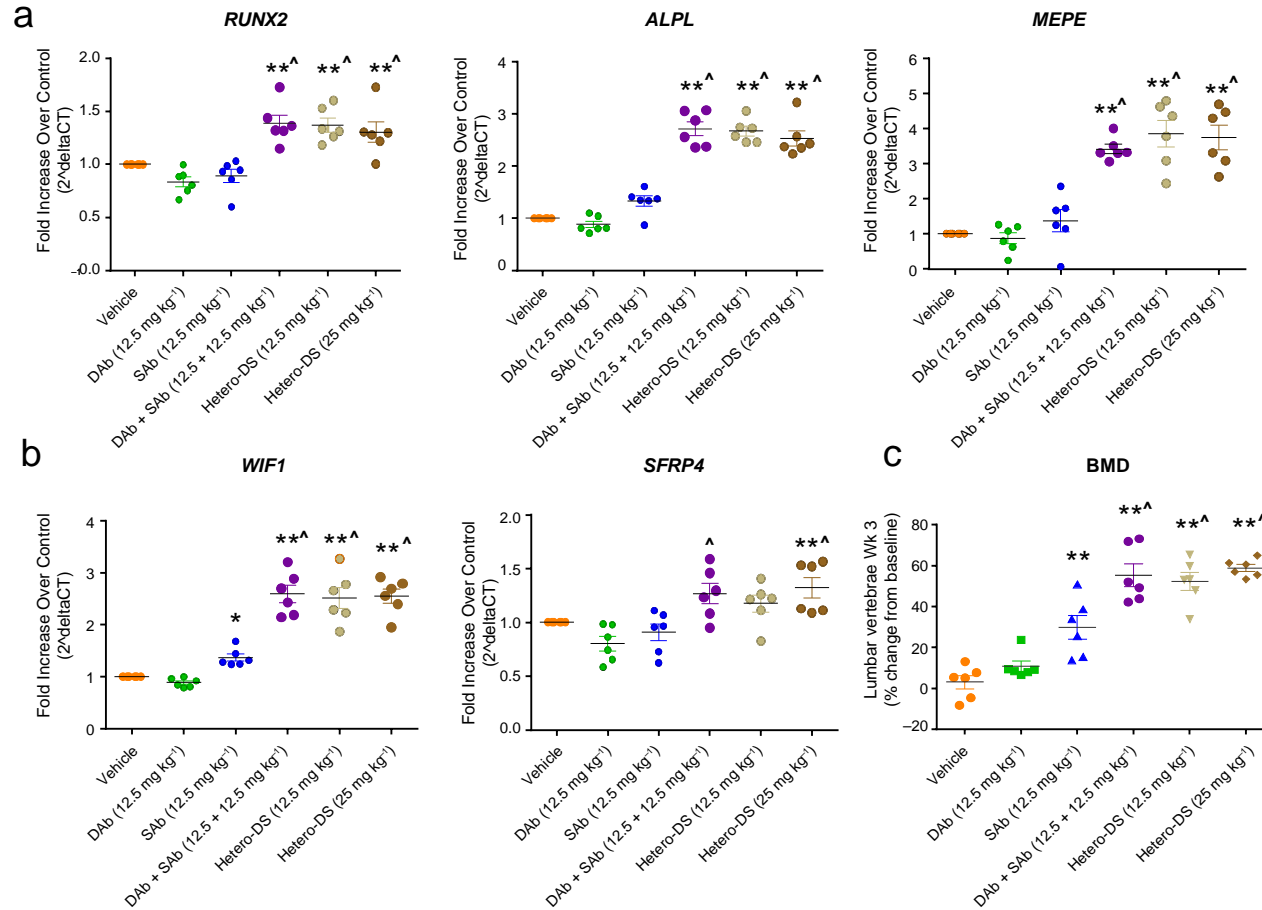

**Supplementary Figure 7** Analysis of osteogenic gene expression in mice treated with monospecific, bispecific and combination therapy. \* $P < 0.05$  vs Vehicle, \*\* $P < 0.01$  vs Vehicle,  $^{\wedge}P < 0.05$  vs SAb; One-way ANOVA, Tukey's *post hoc* test. **(a)** Taqman gene expression analysis of osteogenic genes in the lumbar vertebrae of mice treated with Hetero-DS ( $n = 6$  per group). Genes of interest shown were normalized to a housekeeping gene (*HPRT*). Data are presented as Mean  $\pm$  SE. **(b)** Taqman gene expression analysis of Wnt antagonists *WIF1* and *SFRP4* following treatment with monotherapy and Hetero-DS in the lumbar vertebrae of young mice. **(c)** Analysis of bone mineral density (BMD) in the lumbar vertebrae of 10-week-old mice dosed for 3 weeks with Hetero-DS.

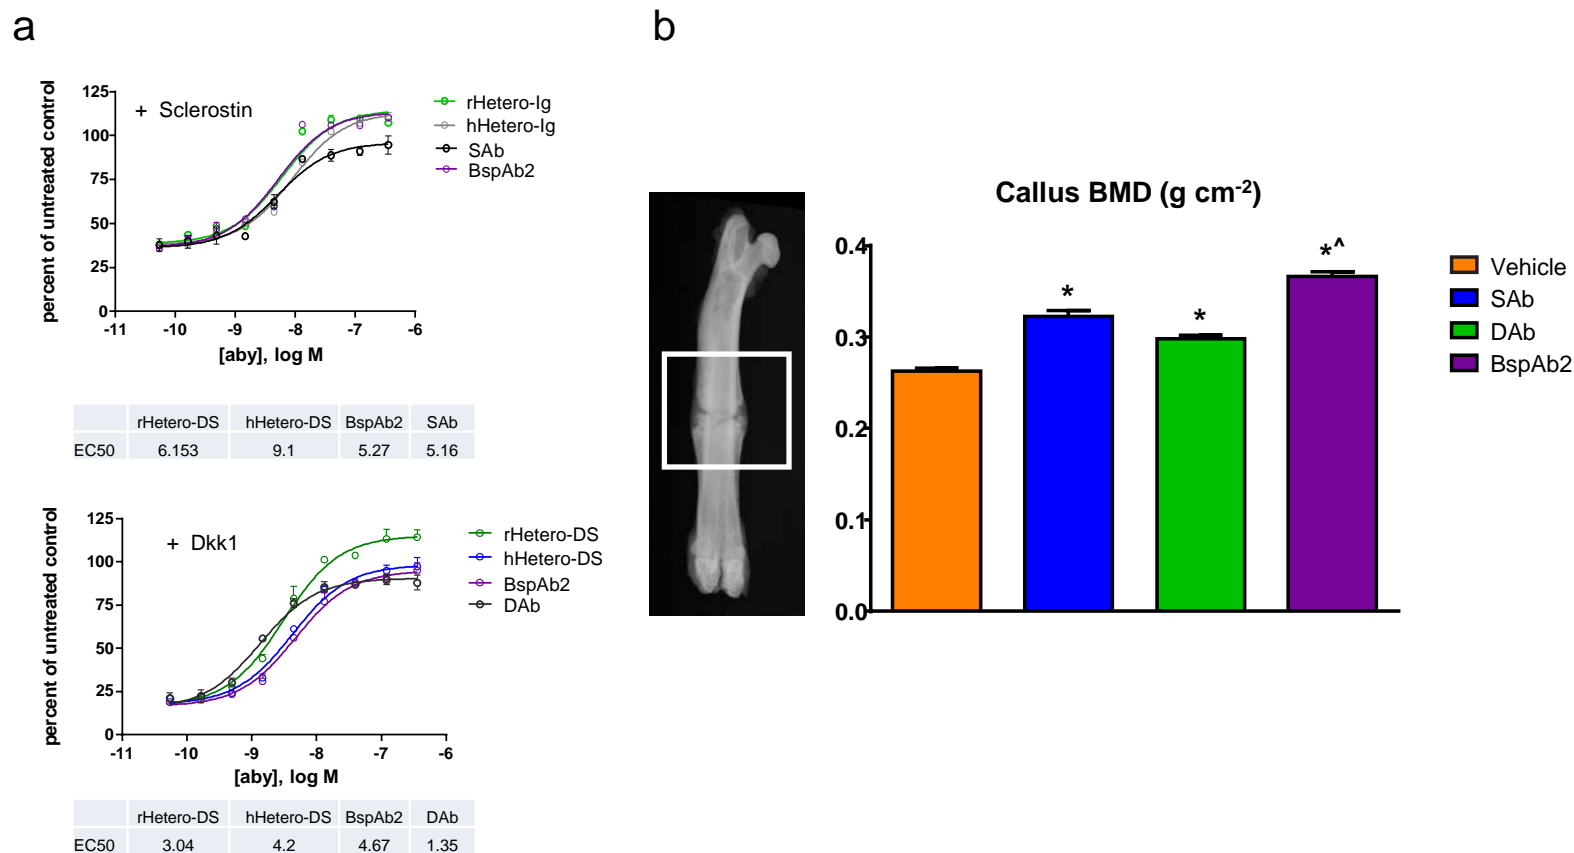

**Supplementary Fig 8** Comparison of *in vitro* and *in vivo* biologic activity of bispecific constructs and monotherapies. **(a)** Bispecific constructs (rHetero-DS, hHetero-DS, BspAb2) and control parental antibodies (DAb and SAb) were compared in a MC3T3E1 Topflash Wnt reporter assay with the EC50s depicted in the insert tables. Data represent at least two experiments and are presented as Mean  $\pm$  SEM. **(b)** Administration of BspAb2, DAb and SAb for 5 weeks in 3-month-old rats dose-dependently increased DXA BMD at the midshaft callus in a closed femur fracture model. Doses administered were  $0.172 \mu\text{mol kg}^{-1}$ ,  $0.33 \mu\text{mol kg}^{-1}$  and  $0.33 \mu\text{mol kg}^{-1}$  respectively. Data are from one experiment with 18 rats per treatment group. Data presented as Mean  $\pm$  SEM; \* $P < 0.05$  vs Vehicle and  $^{\wedge}P < 0.05$  vs SAb and DAb by ANOVA + Tukey's *post hoc* test.



**Supplementary Table 1** Bone histomorphometry in OVX rats

|                     | Sham                                                              | OVX                      | Scl-Ab                    | DKK1-Ab                    | Combo                                 |                                        |
|---------------------|-------------------------------------------------------------------|--------------------------|---------------------------|----------------------------|---------------------------------------|----------------------------------------|
| <b>L2 Vertebra</b>  | <b>BV/TV (%)</b>                                                  | 38.6 ± 1.0               | 27.8 ± 1.3 <sup>^</sup>   | 57.4 ± 2.7 <sup>*^</sup>   | 31.3 ± 1.2 <sup>^</sup>               | 67.6 ± 1.5 <sup>*^<sup>s</sup></sup>   |
|                     | <b>ES/BS (%)</b>                                                  | 2.41 ± 0.15              | 4.60 ± 0.36 <sup>^</sup>  | 1.82 ± 0.27 <sup>*</sup>   | 4.11 ± 0.37 <sup>^</sup>              | 0.45 ± 0.11 <sup>*^<sup>s</sup></sup>  |
|                     | <b>Tb.Th (µm)</b>                                                 | 86.4 ± 2.5               | 78.8 ± 3.7                | 185.6 ± 11.5 <sup>*^</sup> | 80.3 ± 3.2                            | 244.0 ± 10.5 <sup>*^<sup>s</sup></sup> |
|                     | <b>Tb.N (mm<sup>-1</sup>)</b>                                     | 4.48 ± 0.09              | 3.54 ± 0.12 <sup>^</sup>  | 3.15 ± 0.15 <sup>^</sup>   | 3.91 ± 0.09 <sup>^</sup>              | 2.80 ± 0.10 <sup>*^</sup>              |
|                     | <b>MS/BS (%)</b>                                                  | 37.1 ± 2.3               | 46.8 ± 2.2 <sup>^</sup>   | 77.0 ± 2.3 <sup>*^</sup>   | 38.8 ± 1.9                            | 91.6 ± 1.5 <sup>*^<sup>s</sup></sup>   |
|                     | <b>MAR (µm day<sup>-1</sup>)</b>                                  | 0.83 ± 0.03              | 0.99 ± 0.02 <sup>^</sup>  | 1.27 ± 0.03 <sup>*^</sup>  | 1.09 ± 0.04 <sup>^</sup>              | 1.40 ± 0.03 <sup>*^<sup>s</sup></sup>  |
|                     | <b>BFR/BS (µm<sup>3</sup> µm<sup>-2</sup> yr<sup>-1</sup>)</b>    | 0.30 ± 0.02              | 0.46 ± 0.02 <sup>^</sup>  | 0.98 ± 0.04 <sup>*^</sup>  | 0.33 ± 0.03                           | 1.28 ± 0.04 <sup>*^<sup>s</sup></sup>  |
| <b>Tibia</b>        | <b>Ct.B.Ar (mm<sup>2</sup>)</b>                                   | 3.64 ± 0.04              | 4.04 ± 0.07 <sup>^</sup>  | 4.37 ± 0.11 <sup>^</sup>   | 4.10 ± 0.09 <sup>^</sup>              | 4.68 ± 0.14 <sup>*^</sup>              |
|                     | <b>Ct.Th (µm)</b>                                                 | 518 ± 6                  | 512 ± 8                   | 603 ± 10 <sup>*^</sup>     | 541 ± 13                              | 637 ± 13 <sup>*^</sup>                 |
|                     | <b>Ps.MS/BS (mm)</b>                                              | 34.9 ± 4.9               | 55.9 ± 4.8 <sup>^</sup>   | 97.4 ± 2.4 <sup>*^</sup>   | 68.7 ± 7.5 <sup>^</sup>               | 97.3 ± 1.0 <sup>*^</sup>               |
|                     | <b>Ps.MAR (µm day<sup>-1</sup>)</b>                               | 0.70 ± 0.08              | 0.85 ± 0.07               | 1.73 ± 0.17 <sup>*^</sup>  | 0.98 ± 0.14                           | 2.29 ± 0.19 <sup>*^</sup>              |
|                     | <b>Ps.BFR/BS (µm<sup>3</sup> µm<sup>-2</sup> yr<sup>-1</sup>)</b> | 0.27 ± 0.06              | 0.49 ± 0.07               | 1.69 ± 0.17 <sup>*^</sup>  | 0.73 ± 0.16                           | 2.23 ± 0.19 <sup>*^</sup>              |
|                     | <b>Ec.MS/BS (%)</b>                                               | 14.4 ± 2.7               | 32.0 ± 3.8 <sup>^</sup>   | 96.4 ± 1.3 <sup>*^</sup>   | 43.6 ± 3.3 <sup>*^</sup>              | 98.7 ± 0.8 <sup>*^</sup>               |
|                     | <b>Ec.MAR (µm day<sup>-1</sup>)</b>                               | 0.46 ± 0.08              | 0.75 ± 0.04 <sup>^</sup>  | 1.27 ± 0.06 <sup>*^</sup>  | 0.78 ± 0.05 <sup>^</sup>              | 1.57 ± 0.04 <sup>*^<sup>s</sup></sup>  |
|                     | <b>Ec.BFR/BS (µm<sup>3</sup> µm<sup>-2</sup> yr<sup>-1</sup>)</b> | 0.12 ± 0.02              | 0.24 ± 0.04 <sup>^</sup>  | 1.23 ± 0.06 <sup>*^</sup>  | 0.33 ± 0.03 <sup>^</sup>              | 1.55 ± 0.03 <sup>*^<sup>s</sup></sup>  |
| <b>Ec.ES/BS (%)</b> | 2.41 ± 0.62                                                       | 8.12 ± 1.10 <sup>^</sup> | 0.00 ± 0.00 <sup>*^</sup> | 2.64 ± 0.52 <sup>*</sup>   | 0.00 ± 0.00 <sup>*^<sup>s</sup></sup> |                                        |

Mean ± SE. <sup>^</sup>*P* < 0.05 vs Sham, <sup>\*</sup>*P* < 0.05 vs OVX, <sup>s</sup>*P* < 0.05 vs Scl-Ab by ANOVA + Tukey's

**Supplementary Table 2** Bone histomorphometry in mice treated with Hetero-DS

|                        | Vehicle                                                           | DKK1-Ab      | Scl-Ab       | Hetero-DS 12.5 | Hetero-DS 25               | Combo                      |                            |
|------------------------|-------------------------------------------------------------------|--------------|--------------|----------------|----------------------------|----------------------------|----------------------------|
| <b>Distal Femur</b>    | <b>BV/TV (%)</b>                                                  | 13.4 ± 0.7   | 18.6 ± 0.6   | 27.7 ± 1.6*    | 50.9 ± 2.7* <sup>s</sup>   | 50.3 ± 2.4* <sup>s</sup>   | 48.0 ± 1.7* <sup>s</sup>   |
|                        | <b>ES/BS (%)</b>                                                  | 5.73 ± 0.74  | 4.88 ± 0.72  | 4.18 ± 0.60    | 1.13 ± 0.15* <sup>s</sup>  | 0.68 ± 0.23* <sup>s</sup>  | 1.11 ± 0.46* <sup>s</sup>  |
|                        | <b>Tb.Th (µm)</b>                                                 | 31.0 ± 1.3   | 38.1 ± 1.2   | 56.4 ± 3.9*    | 93.3 ± 6.8* <sup>s</sup>   | 94.6 ± 5.7* <sup>s</sup>   | 94.2 ± 6.3* <sup>s</sup>   |
|                        | <b>Tb.N (mm<sup>-1</sup>)</b>                                     | 4.35 ± 0.24  | 4.90 ± 0.16  | 4.95 ± 0.22    | 5.50 ± 0.13*               | 5.35 ± 0.17*               | 5.18 ± 0.26                |
|                        | <b>MS/BS (%)</b>                                                  | 34.8 ± 6.1   | 31.4 ± 3.7   | 69.4 ± 1.7*    | 87.3 ± 1.4* <sup>s</sup>   | 91.4 ± 2.1* <sup>s</sup>   | 92.3 ± 2.3* <sup>s</sup>   |
|                        | <b>MAR (µm day<sup>-1</sup>)</b>                                  | 0.64 ± 0.04  | 0.66 ± 0.02  | 0.80 ± 0.02*   | 0.84 ± 0.02*               | 0.83 ± 0.03*               | 0.79 ± 0.05*               |
|                        | <b>BFR/BS (µm<sup>3</sup> µm<sup>-2</sup> yr<sup>-1</sup>)</b>    | 80.0 ± 14.7  | 76.3 ± 10.2  | 203.2 ± 7.7*   | 268.6 ± 10.7* <sup>s</sup> | 275.9 ± 8.7* <sup>s</sup>  | 266.5 ± 14.0* <sup>s</sup> |
| <b>Femur Diaphysis</b> | <b>Ct.B.Ar (mm<sup>2</sup>)</b>                                   | 0.77 ± 0.02  | 0.84 ± 0.02  | 0.98 ± 0.02*   | 0.91 ± 0.03*               | 0.98 ± 0.02*               | 1.01 ± 0.05*               |
|                        | <b>Ct.Th (µm)</b>                                                 | 187.8 ± 7.1  | 210.6 ± 2.3  | 245.2 ± 3.7*   | 231.7 ± 5.3*               | 240.8 ± 2.7*               | 247.5 ± 5.8*               |
|                        | <b>Ps.Pm (mm)</b>                                                 | 4.90 ± 0.04  | 4.79 ± 0.08  | 4.96 ± 0.10    | 4.83 ± 0.11                | 5.00 ± 0.09                | 5.09 ± 0.22                |
|                        | <b>Ec.Pm (mm)</b>                                                 | 3.37 ± 0.11  | 3.20 ± 0.08  | 2.99 ± 0.05*   | 3.06 ± 0.06                | 3.16 ± 0.08                | 3.02 ± 0.08*               |
|                        | <b>Ps.MS/BS (%)</b>                                               | 24.4 ± 3.2   | 24.0 ± 2.5   | 65.0 ± 4.6*    | 59.8 ± 4.6*                | 86.4 ± 4.2*                | 75.4 ± 8.8*                |
|                        | <b>Ps.MAR (µm day<sup>-1</sup>)</b>                               | 0.48 ± 0.04  | 0.45 ± 0.02  | 0.80 ± 0.03*   | 0.81 ± 0.05*               | 0.94 ± 0.03*               | 0.83 ± 0.07*               |
|                        | <b>Ps.BFR/BS (µm<sup>3</sup> µm<sup>-2</sup> yr<sup>-1</sup>)</b> | 44.2 ± 8.6   | 39.6 ± 4.7   | 190.8 ± 15.6*  | 178.3 ± 19.8*              | 298.7 ± 21.3* <sup>s</sup> | 233.7 ± 36.9*              |
|                        | <b>Ec.MS/BS (%)</b>                                               | 52.6 ± 11.0  | 70.9 ± 9.2   | 99.6 ± 0.3*    | 97.1 ± 1.0*                | 97.6 ± 0.9*                | 97.4 ± 0.5*                |
|                        | <b>Ec.MAR (µm day<sup>-1</sup>)</b>                               | 0.56 ± 0.05  | 0.55 ± 0.03  | 0.73 ± 0.05    | 0.92 ± 0.03*               | 0.92 ± 0.04* <sup>s</sup>  | 0.95 ± 0.06* <sup>s</sup>  |
|                        | <b>Ec.BFR/BS (µm<sup>3</sup> µm<sup>-2</sup> yr<sup>-1</sup>)</b> | 114.5 ± 30.7 | 142.5 ± 18.7 | 268.9 ± 17.9*  | 324.0 ± 7.8*               | 328.6 ± 12.8*              | 336.7 ± 18.9*              |
| <b>Ec.ES/BS (%)</b>    | 9.77 ± 0.86                                                       | 4.90 ± 1.13* | 0.00 ± 0.00* | 0.85 ± 0.73*   | 0.00 ± 0.00*               | 0.40 ± 0.27*               |                            |

Mean ± SE. \**P* < 0.05 vs Vehicle, <sup>s</sup>*P* < 0.05 vs Scl-Ab by ANOVA + Tukey's
